# Supplementary material for: Liver mitochondrial function in ZDF rats during the early stages of diabetes disease
Source: PubMed Central journal article supplement (PMC4758924; doi:10.14814/phy2.12686), 2016-02-04

ZDF lean

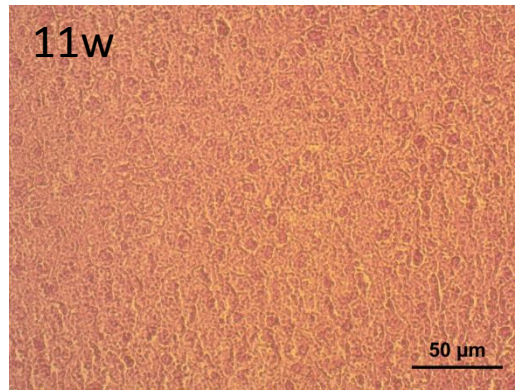

ZDF fa/fa

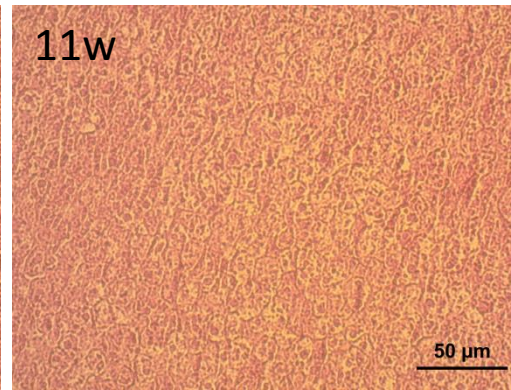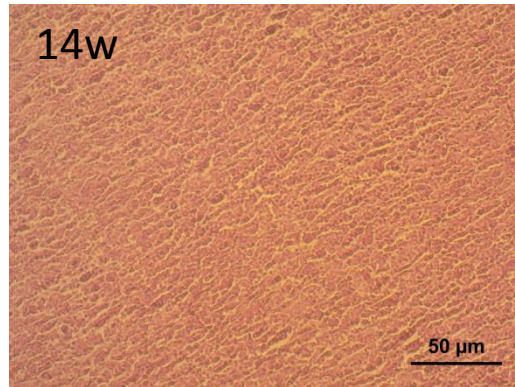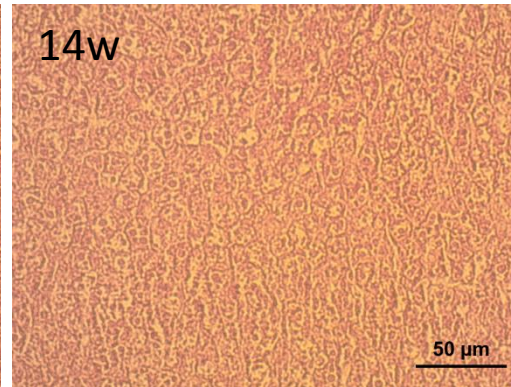

Supplement: PHY2-4-e12686-s001.pdf [file PHY2-4-e12686-s001.pdf]
